# Supplementary material for: Boosting the performance of D–A–D type hole-transporting materials for perovskite solar cells via tuning the acceptor group
Source: Royal Society of Chemistry journal article supplement (doi:10.1039/d0nj03306e), 2020-01-01
Supplement: d0nj03306e1.pdf [file d0nj03306e1.pdf]

Supplementary data for

Boosting performance of D-A-D type hole-transporting materials for  
perovskite solar cells via tuning the acceptor group

Zhu-Zhu Sun<sup>a,\*</sup>, Mengyao Hao<sup>b</sup>, Shuai Feng<sup>c</sup>, Wei-Lu Ding<sup>d</sup>, Xing-Liang Peng<sup>e</sup>

*<sup>a</sup>Energy-Saving Building Materials Innovative Collaboration Center of Henan Province, Xinyang Normal University, Xinyang 464000, China*

*<sup>b</sup>School of Chemistry and Chemical Engineering, Beijing Institute of Technology, 100081 Beijing, China*

*<sup>c</sup>College of Chemistry and Chemical Engineering, Taishan University, Taian 271021, China*

*<sup>d</sup>Beijing Key Laboratory of Ionic Liquids Clean Process, CAS Key Laboratory of Green Process and Engineering, State Key Laboratory of Multiphase Complex Systems, Institute of Process Engineering, Chinese Academy of Sciences, Beijing 100190, China*

*<sup>e</sup>MOE Key Laboratory of Organic Optoelectronics and Molecular Engineering, Department of Chemistry, Tsinghua University, Beijing 100084, China*

*E-mail: Z.Z.Sun: zhuzhusun@xynu.edu.cn*

## Computational details

The ground-state geometry optimizations are carried out with density functional theory (DFT) at the B3LYP/6-31G\*\* level.<sup>1</sup> On the basis of the optimized geometries, the light absorption spectra are calculated by time-dependent DFT (TD-DFT) method at the CAM-B3LYP/6-31G\*\* level.<sup>2</sup> The dichloromethane (DCM) solvent effects are simulated with the C-PCM method,<sup>3</sup> and the frequency calculations are performed to confirm the energetic minima. To evaluate the charge transfer properties from ground-state to the first singlet excited-state, the transferred charge amounts and distance, and charge density difference (CDD) maps are obtained with the method of Ciofini *et al.*<sup>4</sup> Based on the optimized ground-geometries, the transferred charges are calculated at the CAM-B3LYP/6-31G\*\* level to keep consistent with the absorption calculations, and the CDD maps are depicted by the Multiwfn 3.3.8.<sup>5</sup> Particularly, the SMD model, coupled with the M05-2X/6-31G\*\* method are used to calculate the solvation Gibbs free energies.<sup>6</sup> All above calculations are implemented with Gaussian 09 package.<sup>7</sup>

As we known, the organic small molecules usually display a weak electronic coupling between adjacent molecules, and thus the thermally activated hopping and diffusion model is employed to describe the charge transportation of designed system in this work. With Einstein relation,<sup>8</sup> the hole mobility can be expressed as:

$$\mu = \frac{eD}{k_B T}$$

where  $e$  means the unit charge, and  $D$  is the diffusion coefficient, with formula as

$$D = \frac{1}{2d} \sum_i r_i^2 k_i p_i$$

where  $i$  is the hole transfer pathway,  $r_i$  is the centroid to centroid distance,  $d$  is the spatial dimensionality and taken as 1 in this work,<sup>9,10</sup> and  $p_i = \frac{k_i}{\sum_i k_i}$  is the relative probability for hole hopping to the  $i$ th pathway.

With Marcus theory of electron transfer, the hole hopping rate ( $\kappa$ ) is calculated using the formula as follows:<sup>11</sup>

$$\kappa = \frac{2\pi}{\hbar} V_{ab}^2 \frac{1}{\sqrt{4\pi\lambda k_B T}} \exp[-\lambda/4k_B T]$$

where  $V_{ab}$  denotes the hole transfer integral,  $\lambda$  represents the reorganization energy,  $\hbar$  is the Planck's constant,  $k_B$  is the Boltzmann's constant, and  $T$  is the temperature in Kelvin, respectively.

The reorganization energy is evaluated with an adiabatic potential energy surface approach,<sup>12</sup> and the transfer integral is calculated with a direct coupling method:<sup>13</sup>

$$V_{ab} = \langle \psi_{HOMO}^{0,a} | F | \psi_{HOMO}^{0,b} \rangle$$

where  $\psi_{HOMO}^{0,a}$  and  $\psi_{HOMO}^{0,b}$  are the HOMOs of two adjacent molecules  $a$  and  $b$  with no intermolecular interaction is present, and  $F$  is the Fock operator for the dimer.

To obtain the stable dimers for hole transfer, the 30 ps molecular dynamics (MD) simulations are carried out firstly with the DFTB+ 1.2.2 package.<sup>14</sup> The 3ob-3-1 SK parameters for C, N, O, S and H, and the NVE ensemble were employed. Based on the rough dimers, which come from dynamic simulations with the lowest energies, the energy optimizations are further implemented with the Gaussian 09 package at the B3LYP/6-31G\*\* level to get accurate dimeric geometries. The dispersion corrections are also considered with the B3LYP-D3 method. Finally, the hole transfer integrals

are calculated with the PW91PW91/6-31G\*\* method,<sup>15</sup> which has been shown as a better choice for describing of intermolecular electronic coupling at the DFT level.

## References

1. A. D. Becke, *J. Chem. Phys.*, 1993, **98**, 5648-5652.
2. Z. Z. Sun, S. Feng, C. Gu, N. Cheng and J. Liu, *Phys. Chem. Chem. Phys.*, 2019, **21**, 15206-15214.
3. J. Tomasi, B. Mennucci and R. Cammi, *Chem. Rev.*, 2005, **105**, 2999-3093.
4. T. Le Bahers, C. Adamo and I. Ciofini, *J. Chem. Theory Comput.*, 2011, **7**, 2498-2506.
5. T. Lu and F. W. Chen, *J. Comput. Chem.*, 2012, **33**, 580-592.
6. J. Ho, A. Klamt and M. L. Coote, *J. Phys. Chem. A*, 2010, **114**, 13442-13444.
7. M. J. Frisch, G. W. Trucks, H. B. Schlegel, G. E. Scuseria, M. A. Robb, J. R. Cheeseman, G. Scalmani, V. Barone, B. Mennucci, G. A. Petersson, H. Nakatsuji, M. Caricato, X. Li, H. P. Hratchian, A. F. Izmaylov, J. Bloino, G. Zheng, J. L. Sonnenberg, M. Hada, M. Ehara, K. Toyota, R. Fukuda, J. Hasegawa, M. Ishida, T. Nakajima, Y. Honda, O. Kitao, H. Nakai, T. Vreven, J. A. Montgomery, Jr., J. E. Peralta, F. Ogliaro, M. Bearpark, J. J. Heyd, E. Brothers, K. N. Kudin, V. N. Staroverov, R. Kobayashi, J. Normand, K. Raghavachari, A. Rendell, J. C. Burant, S. S. Iyengar, J. Tomasi, M. Cossi, N. Rega, J. M. Millam, M. Klene, J. E. Knox, J. B. Cross, V. Bakken, C. Adamo, J. Jaramillo, R. Gomperts, R. E. Stratmann, O. Yazyev, A. J. Austin, R. Cammi, C. Pomelli, J. W. Ochterski, R. L. Martin, K. Morokuma, V. G. Zakrzewski, G. A. Voth, P. Salvador, J. J. Dannenberg, S. Dapprich, A. D. Daniels, Ö. Farkas, J. B. Foresman, J. V. Ortiz, J. Cioslowski, and D. J. Fox, *Gaussian 09, Revision D.01*, Gaussian, Inc., Wallingford, CT, 2009.
8. L. B. Schein and A. R. McGhie, *Phys. Rev. B*, 1979, **20**, 1631-1639.
9. W. J. Chi, Q. S. Li and Z. S. Li, *Nanoscale*, 2016, **8**, 6146-6154.
10. W. J. Chi, P. P. Sun and Z. S. Li, *Phys. Chem. Chem. Phys.*, 2016, **18**, 27073-27077.
11. R.A. Marcus, N. Sutin, *Biochim. Biophys. Acta*, 1985, **811**, 265-322.
12. Z. Z. Sun, S. Feng and W. L. Ding, *Synth. Met.*, 2020, **259**, 116219.
13. G. J. Nan, L. J. Wang, X. D. Yang, Z. G. Shuai and Y. Zhao, *J. Chem. Phys.*, 2009, **130**, 024704.
14. B. Aradi, B. Hourahine and T. Frauenheim, *J. Phys. Chem. A*, 2007, **111**, 5678-5684.
15. J. Huang and M. Kertesz, *Chem. Phys. Lett.*, 2004, **390**, 110-115.

**Table S1** Calculated frontier molecular orbital energies of the designed HTMs.

| HTMs | $E_{HOMO}^a$ |                |       |       | $E_{LUMO}^b$ |                |       |       |
|------|--------------|----------------|-------|-------|--------------|----------------|-------|-------|
|      | B3LYP        | B3LYP<br>-semi | PBE33 | PBE38 | B3LYP        | B3LYP<br>-semi | PBE33 | PBE38 |
| SM-1 | -4.69        | -5.31          | -5.27 | -5.43 | -2.35        | -3.37          | -2.13 | -2.04 |
| SM-2 | -4.75        | -5.38          | -5.34 | -5.50 | -2.13        | -3.10          | -1.89 | -1.78 |
| SM-3 | -4.74        | -5.36          | -5.33 | -5.49 | -2.49        | -3.45          | -2.28 | -2.18 |

<sup>a</sup> Calculated HOMO energies (in eV). <sup>b</sup> Calculated LOMO energies (in eV).

**Table S2** Calculated frontier molecular orbital energies, adiabatic ionization potential (*IP*) and adiabatic electron affinity (*EA*) of electron-donor and acceptor groups with the B3LYP/6-31G\*\* method.

| HTMs   | $E_{H^a}$ | $E_{L^b}$ | $E_{IP}$ | $E_{EA}$ |
|--------|-----------|-----------|----------|----------|
| MeOTPA | -4.78     | -0.47     | 4.69     | 0.54     |
| BT     | -6.63     | -2.40     | 6.70     | 2.38     |
| PT     | -6.34     | -2.14     | 6.29     | 2.19     |
| TBT    | -6.09     | -2.51     | 6.02     | 2.62     |

<sup>a</sup> Calculated HOMO energies (in eV). <sup>b</sup> Calculated LOMO energies (in eV).

<sup>c</sup> Adiabatic ionization potentials (in eV). <sup>d</sup> Adiabatic electron affinities (in eV).

**Table S3** Calculated ground and excited-state properties of the designed HTMs with the CAM-B3LYP/6-31G\*\* method.

| HTMs | $E_{Ha}$ | $E_{Lb}$ | $E_{H-Lc}$ | $\lambda_{absd}$ | $\Delta Ee$ | $ff$ | <i>Assignment</i> <sup>g</sup> |
|------|----------|----------|------------|------------------|-------------|------|--------------------------------|
| SM-1 | -5.91    | -1.30    | 4.62       | 446              | 2.78        | 0.89 | <i>H</i> → <i>L</i> (83%)      |
| SM-2 | -5.99    | -1.02    | 4.97       | 367              | 3.38        | 1.49 | <i>H</i> → <i>L</i> (65%)      |
| SM-3 | -5.97    | -1.44    | 4.54       | 400              | 3.10        | 0.08 | <i>H</i> → <i>L</i> (73%)      |

<sup>a</sup> Calculated HOMO energies (in eV). <sup>b</sup> Calculated LOMO energies (in eV). <sup>c</sup> Energy gaps (in eV). <sup>d</sup> Maximum absorption wavelengths (in nm). <sup>e</sup> Excitation energies (in eV). <sup>f</sup> Oscillator strengths. <sup>g</sup> Main orbital contributions (H = HOMO, L = LUMO).

**Table S4** Calculated ground and excited-state properties of the designed HTMs with the MPW1K/6-31G\*\* method.

| HTMs | $E_{H^a}$ | $E_{L^b}$ | $E_{H-L^c}$ | $\lambda_{abs^d}$ | $\Delta E^e$ | $f^f$ | <i>Assignment<sup>g</sup></i> |
|------|-----------|-----------|-------------|-------------------|--------------|-------|-------------------------------|
| SM-1 | -5.65     | -1.93     | 3.72        | 481               | 2.58         | 0.78  | <i>H</i> → <i>L</i> (92%)     |
| SM-2 | -5.73     | -1.67     | 4.06        | 398               | 3.11         | 0.91  | <i>H</i> → <i>L</i> (85%)     |
| SM-3 | -5.71     | -2.07     | 3.63        | 447               | 2.77         | 0.05  | <i>H</i> → <i>L</i> (89%)     |

<sup>a</sup> Calculated HOMO energies (in eV). <sup>b</sup> Calculated LOMO energies (in eV). <sup>c</sup> Energy gaps (in eV). <sup>d</sup> Maximum absorption wavelengths (in nm). <sup>e</sup> Excitation energies (in eV). <sup>f</sup> Oscillator strengths. <sup>g</sup> Main orbital contributions (H = HOMO, L = LUMO).



**Table S5** Calculated ground and excited-state properties of the designed HTMs with the BMK/6-31G\*\* method.

| HTMs | $E_{Ha}$ | $E_{Lb}$ | $E_{H-Lc}$ | $\lambda_{absd}$ | $\Delta E^e$ | $f^f$ | $Assignment^g$          |
|------|----------|----------|------------|------------------|--------------|-------|-------------------------|
| SM-1 | -5.38    | -1.79    | 3.59       | 494              | 2.51         | 0.78  | $H \rightarrow L$ (94%) |
| SM-2 | -5.46    | -1.53    | 3.93       | 408              | 3.04         | 0.87  | $H \rightarrow L$ (88%) |
| SM-3 | -5.44    | -1.94    | 3.50       | 462              | 2.68         | 0.04  | $H \rightarrow L$ (91%) |

<sup>a</sup> Calculated HOMO energies (in eV). <sup>b</sup> Calculated LOMO energies (in eV). <sup>c</sup> Energy gaps (in eV). <sup>d</sup> Maximum absorption wavelengths (in nm). <sup>e</sup> Excitation energies (in eV). <sup>f</sup> Oscillator strengths. <sup>g</sup> Main orbital contributions (H = HOMO, L = LUMO).

**Table S6** Calculated the five lowest excited-states of the SM-3 with the CAM-B3LYP /6-31G\*\* method.

| Excited states | $\lambda_{abs}^a$ | $\Delta E^b$ | $f^c$ | Assignment <sup>d</sup> |               |
|----------------|-------------------|--------------|-------|-------------------------|---------------|
| 1              | 400               | 3.10         | 0.08  | H-0->L+0(73%)           | H-2->L+0(21%) |
| 2              | 360               | 3.44         | 0.43  | H-1->L+0(41%)           | H-0->L+1(21%) |
| 3              | 343               | 3.62         | 1.31  | H-3->L+0(82%)           |               |
| 4              | 340               | 3.65         | 0.76  | H-1->L+0(48%)           | H-0->L+2(24%) |
| 5              | 327               | 3.80         | 0.78  | H-0->L+1(56%)           | H-0->L+2(27%) |

<sup>a</sup> Absorption wavelengths (in nm). <sup>b</sup> Excitation energies (in eV). <sup>c</sup> Oscillator strengths.

<sup>d</sup> Main orbital contributions (H = HOMO, L = LUMO).

**Table S7** Calculated the six lowest excited-states of SM-3 with the MPW1K/6-31G\*\* method.

| Excited states | $\lambda_{abs}^a$ | $\Delta E^b$ | $f^c$ | <i>Assignment</i> <sup>d</sup> |               |
|----------------|-------------------|--------------|-------|--------------------------------|---------------|
| 1              | 447               | 2.77         | 0.05  | H-0->L+0(89%)                  |               |
| 2              | 411               | 3.02         | 0.13  | H-1->L+0(73%)                  | H-0->L+1(22%) |
| 3              | 392               | 3.17         | 0.07  | H-0->L+1(71%)                  | H-1->L+0(24%) |
| 4              | 369               | 3.36         | 0.00  | H-1->L+1(96%)                  |               |
| 5              | 355               | 3.50         | 0.68  | H-0->L+2(55%)                  | H-3->L+0(27%) |
| 6              | 349               | 3.55         | 2.11  | H-3->L+0(66%)                  | H-0->L+2(24%) |

<sup>a</sup> Absorption wavelengths (in nm). <sup>b</sup> Excitation energies (in eV). <sup>c</sup> Oscillator strengths.

<sup>d</sup> Main orbital contributions (H = HOMO, L = LUMO).

**Table S8** Calculated the six lowest excited-states of the SM-3 with the BMK/6-31G\*\* method.

| Excited states | $\lambda_{abs}^a$ | $\Delta E^b$ | $f^c$ | Assignment <sup>d</sup> |
|----------------|-------------------|--------------|-------|-------------------------|
| 1              | 462               | 2.68         | 0.04  | H-0->L+0(91%)           |
| 2              | 427               | 2.90         | 0.11  | H-1->L+0(81%)           |
| 3              | 404               | 3.07         | 0.08  | H-0->L+1(79%)           |
| 4              | 382               | 3.25         | 0.00  | H-1->L+1(96%)           |
| 5              | 361               | 3.43         | 1.97  | H-0->L+2(81%)           |
| 6              | 350               | 3.54         | 0.72  | H-3->L+0(94%)           |

<sup>a</sup> Absorption wavelengths (in nm). <sup>b</sup> Excitation energies (in eV). <sup>c</sup> Oscillator strengths.

<sup>d</sup> Main orbital contributions (H = HOMO, L = LUMO).

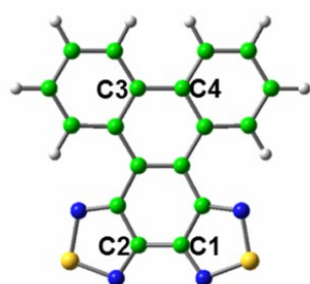

TBT core (top view)  
 $\angle \text{C1-C2-C3-C4} = 16.4^\circ$

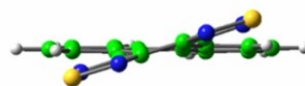

TBT core (side view)

**Fig. S1** Core configuration of the SM-3 and the measured dihedral angle.

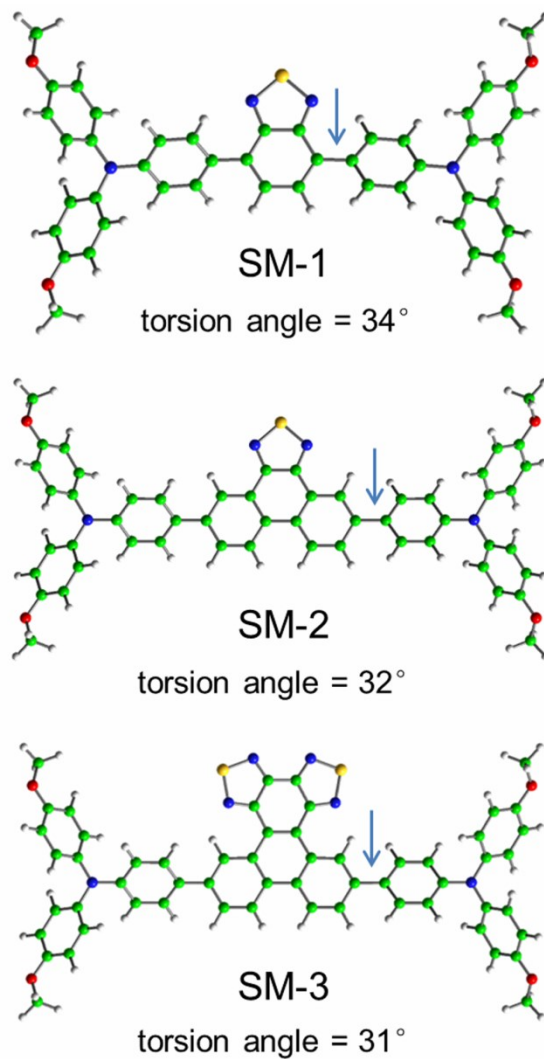

**Fig. S2** Optimized geometries of investigated HTMs, and torsion angles between the MeOTPA-donors and central cores.

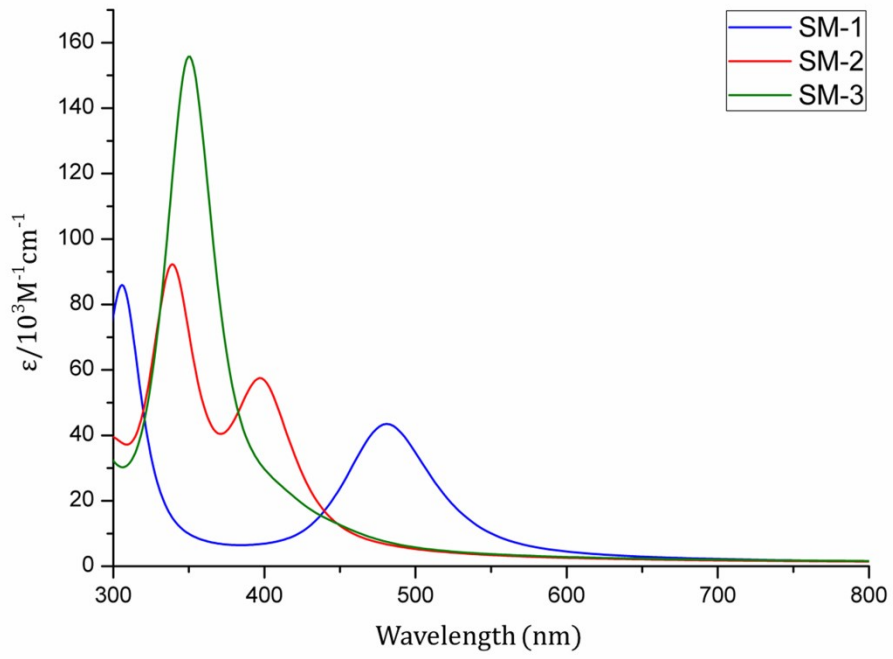

**Fig. S3** Calculated absorption spectra of designed HTMs with the MPW1K/6-31G\*\* method.

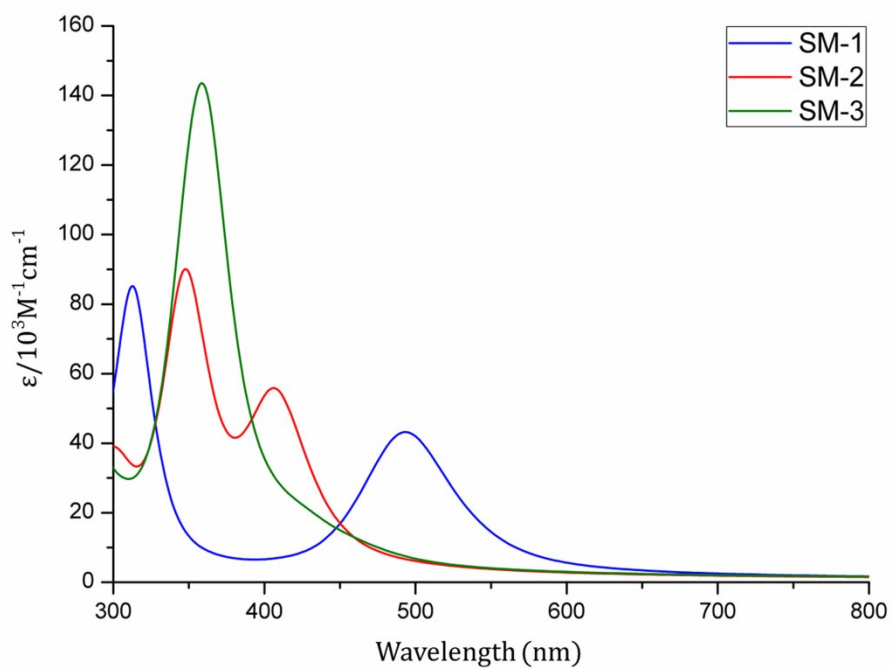

**Fig. S4** Calculated absorption spectra of the designed HTMs with the BMK/6-31G\*\* method.



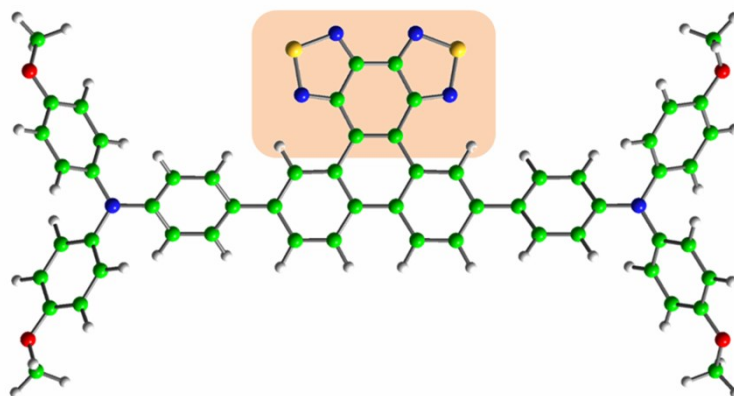

Contributed percentage of the shaded portion to the LUMO is 79.4%.

**Fig. S5** Calculated orbital contributed percentage of bithiadiazole unit to the LUMO.

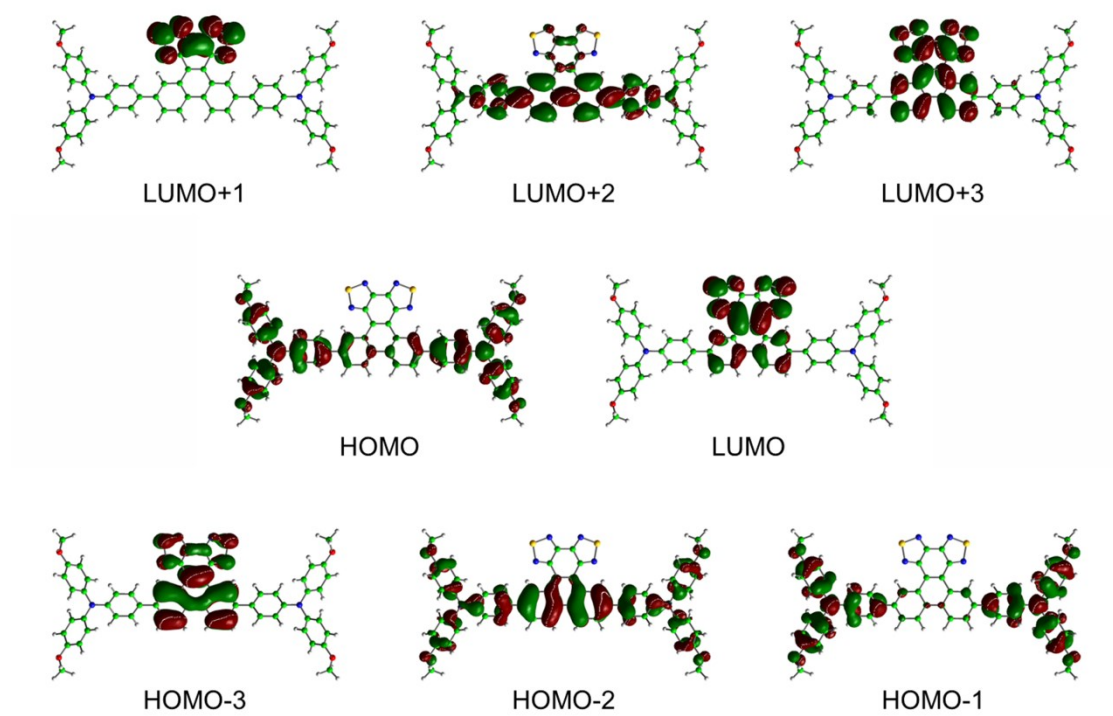

**Fig. S6** Calculated orbital spatial distributions of the SM-3.

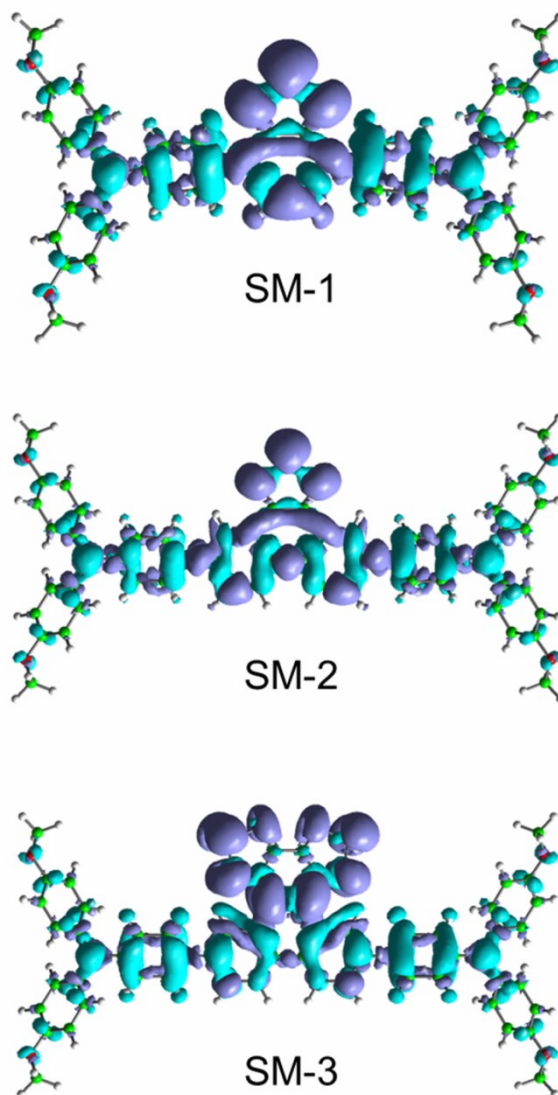

**Fig. S7** CDD maps of the investigated HTMs, the purple and the blue represent where the electrons are increased and reduced, respectively.

## Molecular coordinate

### SM-1

|   |             |             |             |
|---|-------------|-------------|-------------|
| C | 1.47825100  | -0.10286300 | -0.00302400 |
| C | 0.73013500  | -1.33390800 | -0.00127800 |
| C | 0.70971800  | 1.04766300  | 0.00207300  |
| C | -0.73009200 | -1.33393400 | 0.00118900  |
| C | -0.70975800 | 1.04763800  | -0.00299500 |
| H | 1.21008000  | 2.01048900  | 0.02289300  |
| C | -1.47825700 | -0.10291100 | 0.00247700  |
| H | -1.21015000 | 2.01044100  | -0.02413900 |
| S | 0.00007500  | -3.62505900 | 0.00022900  |
| N | 1.25560300  | -2.56543000 | -0.01225600 |
| N | -1.25550000 | -2.56547900 | 0.01263400  |
| N | 7.20347900  | 0.24708800  | -0.02856100 |
| C | 7.84633100  | 1.51553000  | -0.15579100 |
| C | 8.89159400  | 1.69218700  | -1.07804000 |
| C | 7.47038000  | 2.59990200  | 0.64473200  |
| C | 9.54039700  | 2.91464100  | -1.18849600 |
| H | 9.19520500  | 0.86135900  | -1.70660300 |
| C | 8.10252600  | 3.83927400  | 0.52487900  |
| H | 6.67135400  | 2.47796400  | 1.36872800  |
| C | 9.14853100  | 4.00184600  | -0.39192500 |
| H | 10.34932400 | 3.05270300  | -1.89864500 |
| H | 7.78273300  | 4.65697400  | 1.15919300  |
| C | 8.02238100  | -0.91315600 | 0.11935500  |
| C | 9.06584900  | -0.93129300 | 1.06003500  |
| C | 7.82084900  | -2.04523600 | -0.67807000 |
| C | 9.88129500  | -2.04701400 | 1.19266600  |
| H | 9.23571600  | -0.06132400 | 1.68592200  |
| C | 8.62183900  | -3.18025500 | -0.53595400 |
| H | 7.02625000  | -2.04417300 | -1.41717100 |
| C | 9.66324300  | -3.18489500 | 0.40042800  |
| H | 10.68875700 | -2.06264700 | 1.91757400  |
| H | 8.43381500  | -4.03980100 | -1.16764700 |
| O | 9.84253200  | 5.16233400  | -0.58360100 |
| O | 10.51222000 | -4.23256900 | 0.61635900  |
| C | 10.33679500 | -5.41212600 | -0.16327700 |
| H | 11.10504500 | -6.11006500 | 0.17080800  |
| H | 9.34805700  | -5.85746900 | -0.00167800 |
| H | 10.47091500 | -5.21108100 | -1.23268600 |
| C | 9.48978100  | 6.29454300  | 0.20614600  |
| H | 10.15815700 | 7.09787800  | -0.10507700 |
| H | 8.45128000  | 6.59934400  | 0.03079800  |

|   |              |             |             |
|---|--------------|-------------|-------------|
| H | 9.63224000   | 6.09888500  | 1.27543200  |
| C | 2.95382700   | -0.05298900 | -0.02595800 |
| C | 3.62107800   | 0.97410200  | -0.72156600 |
| C | 3.75615500   | -0.98454800 | 0.66019800  |
| C | 5.00568100   | 1.07346300  | -0.73254100 |
| H | 3.04472600   | 1.69002600  | -1.29980900 |
| C | 5.14190100   | -0.88555400 | 0.66842400  |
| H | 3.28654000   | -1.78662200 | 1.21679800  |
| C | 5.79995700   | 0.14643500  | -0.02896200 |
| H | 5.48081400   | 1.86492700  | -1.30095800 |
| H | 5.72398500   | -1.60809500 | 1.22907000  |
| N | -7.20348900  | 0.24709400  | 0.02737200  |
| C | -8.02257200  | -0.91312000 | -0.11955900 |
| C | -9.06697400  | -0.93123500 | -1.05922700 |
| C | -7.82040600  | -2.04517500 | 0.67775300  |
| C | -9.88266400  | -2.04687900 | -1.19099500 |
| H | -9.23737100  | -0.06129800 | -1.68501800 |
| C | -8.62165400  | -3.18012000 | 0.53647400  |
| H | -7.02511200  | -2.04418600 | 1.41610900  |
| C | -9.66395500  | -3.18474200 | -0.39891000 |
| H | -10.69082400 | -2.06246600 | -1.91513200 |
| H | -8.43308600  | -4.03964000 | 1.16804400  |
| C | -7.84617400  | 1.51560600  | 0.15499400  |
| C | -8.89037000  | 1.69266000  | 1.07836300  |
| C | -7.47097000  | 2.59966300  | -0.64629600 |
| C | -9.53892300  | 2.91522200  | 1.18913700  |
| H | -9.19335500  | 0.86206100  | 1.70753500  |
| C | -8.10284300  | 3.83914200  | -0.52615700 |
| H | -6.67275300  | 2.47736200  | -1.37113000 |
| C | -9.14782700  | 4.00211300  | 0.39175100  |
| H | -10.34704400 | 3.05361500  | 1.90014000  |
| H | -7.78366600  | 4.65660800  | -1.16108800 |
| O | -10.51323000 | -4.23236600 | -0.61397000 |
| O | -9.84149100  | 5.16272800  | 0.58379400  |
| C | -9.48952700  | 6.29461900  | -0.20677100 |
| H | -10.15754700 | 7.09809700  | 0.10484300  |
| H | -8.45082900  | 6.59944600  | -0.03262800 |
| H | -9.63311600  | 6.09854500  | -1.27583200 |
| C | -10.33711200 | -5.41190400 | 0.16554200  |
| H | -11.10574500 | -6.10980600 | -0.16774900 |
| H | -9.34856000  | -5.85732000 | 0.00298100  |
| H | -10.47015500 | -5.21080800 | 1.23508000  |
| C | -2.95383600  | -0.05305900 | 0.02533000  |
| C | -3.75612900  | -0.98485700 | -0.66055900 |

|   |             |             |             |
|---|-------------|-------------|-------------|
| C | -3.62113700 | 0.97425600  | 0.72054900  |
| C | -5.14186500 | -0.88586400 | -0.66890100 |
| H | -3.28648200 | -1.78710400 | -1.21687800 |
| C | -5.00574800 | 1.07362700  | 0.73140700  |
| H | -3.04482500 | 1.69039200  | 1.29857000  |
| C | -5.79997800 | 0.14635300  | 0.02811200  |
| H | -5.72391500 | -1.60858200 | -1.22935600 |
| H | -5.48090200 | 1.86530200  | 1.29950800  |

## SM-2

|   |             |             |             |
|---|-------------|-------------|-------------|
| C | -0.72057300 | -2.06775300 | -0.00804100 |
| C | 0.72055200  | -2.06778400 | -0.00857400 |
| S | -0.00006200 | -4.36201900 | -0.00789300 |
| N | -1.25736500 | -3.28178700 | -0.00787000 |
| N | 1.25728800  | -3.28184200 | -0.00834000 |
| C | -1.46919400 | -0.82132700 | -0.01160500 |
| C | -0.73665600 | 0.39667100  | -0.01085700 |
| C | -2.87099400 | -0.82216400 | -0.00725300 |
| C | -1.49203500 | 1.58787500  | -0.01512300 |
| C | -3.60685100 | 0.36532600  | -0.01256000 |
| H | -3.37825800 | -1.78020700 | 0.02280900  |
| C | -2.87677100 | 1.57501200  | -0.01906300 |
| H | -0.99263900 | 2.54927300  | -0.02893600 |
| H | -3.40800400 | 2.52075500  | -0.05219200 |
| C | 1.46922700  | -0.82139000 | -0.00530600 |
| C | 0.73675500  | 0.39664300  | -0.00748000 |
| C | 2.87102600  | -0.82229500 | -0.00809400 |
| C | 1.49219400  | 1.58781500  | -0.00381100 |
| C | 3.60694200  | 0.36516100  | -0.00255900 |
| H | 3.37828000  | -1.78038800 | -0.03669500 |
| C | 2.87693000  | 1.57489200  | 0.00167600  |
| H | 0.99283400  | 2.54925100  | 0.00860600  |
| H | 3.40817100  | 2.52064100  | 0.03458100  |
| N | 9.34624400  | 0.33527000  | 0.00203100  |
| C | 10.06959100 | -0.89503000 | 0.02644100  |
| C | 11.12258300 | -1.08350900 | 0.93758900  |
| C | 9.76272700  | -1.92997400 | -0.86395400 |
| C | 11.84538000 | -2.26883900 | 0.95007200  |
| H | 11.37358100 | -0.29132800 | 1.63542300  |
| C | 10.46978600 | -3.13402300 | -0.84334000 |
| H | 8.95876900  | -1.79750900 | -1.58063900 |
| C | 11.52254900 | -3.30793200 | 0.06351600  |
| H | 12.66026400 | -2.41565700 | 1.65161000  |
| H | 10.20157000 | -3.91414600 | -1.54532000 |

|   |              |             |             |
|---|--------------|-------------|-------------|
| C | 10.08429600  | 1.55667600  | -0.02107500 |
| C | 11.14368600  | 1.73093300  | -0.92767700 |
| C | 9.78648100   | 2.59660600  | 0.86664200  |
| C | 11.88124900  | 2.90716800  | -0.93840600 |
| H | 11.38816300  | 0.93470200  | -1.62319600 |
| C | 10.50854600  | 3.79173400  | 0.84761600  |
| H | 8.97797700   | 2.47509300  | 1.58014500  |
| C | 11.56744600  | 3.95139500  | -0.05468200 |
| H | 12.70110000  | 3.04277700  | -1.63640900 |
| H | 10.24698500  | 4.57601600  | 1.54747600  |
| O | 12.28698800  | -4.43537800 | 0.16262700  |
| O | 12.34620000  | 5.06926900  | -0.15166900 |
| C | 12.00537100  | -5.51804100 | -0.71971000 |
| H | 10.98709700  | -5.89866600 | -0.57721800 |
| H | 12.13773400  | -5.22703000 | -1.76842200 |
| H | 12.72090500  | -6.30226400 | -0.47081000 |
| C | 12.07445900  | 6.15591900  | 0.72882000  |
| H | 11.06166100  | 6.54927300  | 0.58178400  |
| H | 12.19863500  | 5.86392300  | 1.77826800  |
| H | 12.80084700  | 6.93095000  | 0.48256800  |
| C | 5.08679900   | 0.35843000  | 0.00010300  |
| C | 5.82758200   | 1.37835200  | -0.62461800 |
| C | 5.81620900   | -0.66865300 | 0.62675400  |
| C | 7.21693300   | 1.37345200  | -0.63279200 |
| H | 5.30977000   | 2.17420600  | -1.15138700 |
| C | 7.20522200   | -0.67903500 | 0.63541600  |
| H | 5.28846100   | -1.45794300 | 1.15349800  |
| C | 7.93811500   | 0.34321400  | 0.00131100  |
| H | 7.75211500   | 2.16498800  | -1.14498500 |
| H | 7.73145900   | -1.47586800 | 1.14865200  |
| N | -9.34612700  | 0.33466900  | 0.00042200  |
| C | -10.08384000 | 1.55631200  | 0.02616900  |
| C | -11.13645700 | 1.73302400  | 0.94011800  |
| C | -9.79208700  | 2.59404900  | -0.86607600 |
| C | -11.87351100 | 2.90955600  | 0.95352100  |
| H | -11.37604100 | 0.93848900  | 1.63928300  |
| C | -10.51357500 | 3.78947700  | -0.84459400 |
| H | -8.98880000  | 2.47054200  | -1.58513000 |
| C | -11.56582400 | 3.95158500  | 0.06504200  |
| H | -12.68815300 | 3.04713900  | 1.65721400  |
| H | -10.25682700 | 4.57203900  | -1.54815200 |
| C | -10.06987400 | -0.89540600 | -0.01956400 |
| C | -11.12917300 | -1.08299700 | -0.92358400 |
| C | -9.75752700  | -1.93091200 | 0.86830600  |

|   |              |             |             |
|---|--------------|-------------|-------------|
| C | -11.85260800 | -2.26796700 | -0.93168000 |
| H | -11.38459000 | -0.29037800 | -1.61930300 |
| C | -10.46530800 | -3.13461200 | 0.85192800  |
| H | -8.94870400  | -1.79919300 | 1.57961700  |
| C | -11.52426400 | -3.30762900 | -0.04784000 |
| H | -12.67234400 | -2.41404100 | -1.62770000 |
| H | -10.19275200 | -3.91518000 | 1.55173400  |
| O | -12.34344500 | 5.06993500  | 0.16508700  |
| O | -12.28993400 | -4.43467400 | -0.14230300 |
| C | -12.07744600 | 6.15464900  | -0.71955500 |
| H | -11.06348300 | 6.54787300  | -0.58042900 |
| H | -12.20910700 | 5.86052600  | -1.76749100 |
| H | -12.80177900 | 6.93048400  | -0.46981900 |
| C | -12.00310400 | -5.51775900 | 0.73781100  |
| H | -10.98596900 | -5.89884700 | 0.58857000  |
| H | -12.12848100 | -5.22704300 | 1.78746700  |
| H | -12.72062900 | -6.30155600 | 0.49332800  |
| C | -5.08671000  | 0.35868500  | -0.01176600 |
| C | -5.81790700  | -0.66906300 | -0.63525100 |
| C | -5.82571300  | 1.37918500  | 0.61410000  |
| C | -7.20694700  | -0.67971800 | -0.63947300 |
| H | -5.29168200  | -1.45879000 | -1.16286600 |
| C | -7.21502000  | 1.37404200  | 0.62669800  |
| H | -5.30638900  | 2.17565900  | 1.13843200  |
| C | -7.93802000  | 0.34289000  | -0.00382400 |
| H | -7.73466400  | -1.47714800 | -1.15025900 |
| H | -7.74871000  | 2.16601300  | 1.13976200  |

### SM-3

|   |             |             |             |
|---|-------------|-------------|-------------|
| C | -0.69082700 | -4.12202800 | -0.25379600 |
| C | -1.36809200 | -2.85271600 | -0.39575000 |
| S | -2.90319700 | -4.63123200 | -0.98920000 |
| C | 1.36449300  | -2.85325900 | 0.29846600  |
| C | 0.68442700  | -4.12208700 | 0.16325700  |
| S | 2.89650600  | -4.63254400 | 0.89869000  |
| C | -0.69578900 | -1.56455000 | -0.15576300 |
| C | 0.69464900  | -1.56476400 | 0.05198800  |
| N | -2.62257000 | -3.01415400 | -0.81498000 |
| N | -1.41455500 | -5.19115000 | -0.53936500 |
| N | 1.40621600  | -5.19130700 | 0.45318700  |
| N | 2.61909200  | -3.01578500 | 0.71688200  |
| C | -1.43845100 | -0.30750300 | -0.14302100 |
| C | -0.72382900 | 0.92449100  | -0.07403500 |
| C | -2.85343400 | -0.26413700 | -0.11770200 |



|   |             |             |             |
|---|-------------|-------------|-------------|
| C | -1.46721400 | 2.12696400  | -0.01853400 |
| C | -3.57423200 | 0.92615200  | -0.06444000 |
| H | -3.39804000 | -1.19382400 | -0.11236800 |
| C | -2.84476200 | 2.13634900  | -0.02381600 |
| H | -0.95242200 | 3.07768500  | 0.03587400  |
| H | -3.36863800 | 3.08655300  | -0.00561400 |
| C | 1.43849200  | -0.30825000 | 0.03080400  |
| C | 0.72556900  | 0.92344000  | -0.06195500 |
| C | 2.85366900  | -0.26538300 | 0.02210100  |
| C | 1.47034800  | 2.12417900  | -0.13329800 |
| C | 3.57572800  | 0.92376100  | -0.04024600 |
| H | 3.39782900  | -1.19509800 | 0.03972100  |
| C | 2.84780400  | 2.13320600  | -0.11353600 |
| H | 0.95665200  | 3.07402000  | -0.20930600 |
| H | 3.37245500  | 3.08270800  | -0.14289100 |
| N | 9.31697400  | 0.90106800  | -0.01772600 |
| C | 10.05179200 | 2.12270500  | -0.07645500 |
| C | 11.12628200 | 2.26549100  | -0.97094900 |
| C | 9.73536600  | 3.19614700  | 0.76388000  |
| C | 11.85996900 | 3.44337400  | -1.01557300 |
| H | 11.38567100 | 1.44360800  | -1.63024500 |
| C | 10.45356600 | 4.39247700  | 0.70971600  |
| H | 8.91508600  | 3.10006500  | 1.46771100  |
| C | 11.52752900 | 4.52063200  | -0.17965800 |
| H | 12.69133700 | 3.55436300  | -1.70427100 |
| H | 10.17709500 | 5.20278900  | 1.37325000  |
| C | 10.04017000 | -0.32706300 | 0.05310700  |
| C | 11.09463500 | -0.48168400 | 0.96913300  |
| C | 9.73070800  | -1.39564900 | -0.79582700 |
| C | 11.81605200 | -1.66658000 | 1.02622500  |
| H | 11.34794600 | 0.33636600  | 1.63554900  |
| C | 10.43624500 | -2.59889000 | -0.72964900 |
| H | 8.92580200  | -1.29018400 | -1.51593200 |
| C | 11.49049100 | -2.73897200 | 0.18131500  |
| H | 12.63193800 | -1.78700000 | 1.73165300  |
| H | 10.16573400 | -3.40522300 | -1.40044400 |
| O | 12.30412000 | 5.63713200  | -0.30731300 |
| O | 12.25357100 | -3.86299600 | 0.32255100  |
| C | 12.01501700 | 6.75512500  | 0.52714100  |
| H | 11.00364300 | 7.13931100  | 0.34915500  |
| H | 12.12276800 | 6.50307600  | 1.58870600  |
| H | 12.74314600 | 7.52287600  | 0.26378800  |
| C | 11.96939100 | -4.97767400 | -0.51808900 |
| H | 10.95097500 | -5.35171000 | -0.35977900 |

|   |              |             |             |
|---|--------------|-------------|-------------|
| H | 12.10008400  | -4.72623400 | -1.57720500 |
| H | 12.68461000  | -5.75277600 | -0.24125500 |
| C | 5.05654800   | 0.91819700  | -0.03645800 |
| C | 5.78519600   | -0.07494600 | 0.64412400  |
| C | 5.79861400   | 1.90556400  | -0.71002700 |
| C | 7.17423500   | -0.08328400 | 0.65744000  |
| H | 5.25522900   | -0.83737200 | 1.20696600  |
| C | 7.18830300   | 1.90167100  | -0.71355700 |
| H | 5.28247500   | 2.67363900  | -1.27804200 |
| C | 7.90789000   | 0.90642000  | -0.02506700 |
| H | 7.70015500   | -0.85201100 | 1.21241200  |
| H | 7.72488000   | 2.66675500  | -1.26331500 |
| N | -9.31431000  | 0.89919600  | 0.04821700  |
| C | -10.04031100 | -0.32866700 | 0.01847700  |
| C | -11.13178300 | -0.48900700 | -0.85219000 |
| C | -9.69904900  | -1.39040100 | 0.86399000  |
| C | -11.85757300 | -1.67243900 | -0.86894500 |
| H | -11.41052500 | 0.32369600  | -1.51494600 |
| C | -10.40956400 | -2.59231900 | 0.83760800  |
| H | -8.86525400  | -1.28079600 | 1.54968200  |
| C | -11.50032800 | -2.73795000 | -0.02825100 |
| H | -12.70200000 | -1.79695500 | -1.53918500 |
| H | -10.11385500 | -3.39329100 | 1.50415900  |
| C | -10.04695900 | 2.12215600  | 0.11658300  |
| C | -11.07678900 | 2.28476400  | 1.05871600  |
| C | -9.77102100  | 3.17701100  | -0.76049200 |
| C | -11.80735700 | 3.46418300  | 1.11384100  |
| H | -11.30369400 | 1.47713800  | 1.74704100  |
| C | -10.48556500 | 4.37506300  | -0.69723300 |
| H | -8.98547900  | 3.06480900  | -1.50075700 |
| C | -11.51536700 | 4.52309500  | 0.24012400  |
| H | -12.60435000 | 3.59089900  | 1.83946900  |
| H | -10.24127200 | 5.17086200  | -1.39029300 |
| O | -12.27141000 | -3.86113200 | -0.12799800 |
| O | -12.28447400 | 5.64287300  | 0.38151400  |
| C | -11.95770900 | -4.96800900 | 0.71232700  |
| H | -10.94732600 | -5.34696500 | 0.51830200  |
| H | -12.04621900 | -4.70535200 | 1.77309600  |
| H | -12.68533600 | -5.74365400 | 0.47168000  |
| C | -12.03293000 | 6.74447900  | -0.48637000 |
| H | -11.01404800 | 7.12994700  | -0.36221500 |
| H | -12.18965200 | 6.47274500  | -1.53689700 |
| H | -12.74743400 | 7.51835200  | -0.20433100 |
| C | -5.05480100  | 0.92125400  | -0.03927800 |

|   |             |             |             |
|---|-------------|-------------|-------------|
| C | -5.78187500 | 1.92048600  | 0.63304600  |
| C | -5.79831400 | -0.08419700 | -0.68487100 |
| C | -7.17099500 | 1.91545400  | 0.67030700  |
| H | -5.25330600 | 2.69919500  | 1.17449300  |
| C | -7.18730100 | -0.09412600 | -0.66429700 |
| H | -5.28104100 | -0.85629100 | -1.24638800 |
| C | -7.90572100 | 0.90636500  | 0.01896100  |
| H | -7.69495800 | 2.69014700  | 1.21870600  |
| H | -7.72540700 | -0.87326900 | -1.19239000 |
